# Supplementary material
Source: PubMed Central journal article supplement (PMC8731208)
Supplement: 198_2021_6260_MOESM1_ESM.pdf [file 198_2021_6260_MOESM1_ESM.pdf]

# Differences in Hospital Length of Stay and Total Hospital Charge by Income Level in Patients Hospitalized for Hip Fractures

Osteoporosis International

Anthony J Milto MD, Youssef El Bitar MD, Steven L Scaife MS, Sowmyanarayanan Thuppal MD, PhD

Division of Orthopedics and Rehabilitation, Department of Surgery, Southern Illinois University School of Medicine

Center for Clinical Research, Southern Illinois University School of Medicine

Corresponding Author Email: sthuppal83@siumed.edu

## Hip Fracture ICD 10 CM Codes

S72.001A, S72.001B, S72.001C, S72.002A, S72.002B, S72.002C, S72.009A, S72.009B, S72.009C, S72.011A, S72.011B, S72.011C, S72.012A, S72.012B, S72.012C, S72.019A, S72.019B, S72.019C, S72.021A, S72.021B, S72.021C, S72.022A, S72.022B, S72.022C, S72.023A, S72.023B, S72.023C, S72.024A, S72.024B, S72.024C, S72.025A, S72.025B, S72.025C, S72.026A, S72.026B, S72.026C, S72.031A, S72.031B, S72.031C, S72.032A, S72.032B, S72.032C, S72.033A, S72.033B, S72.033C, S72.034A, S72.034B, S72.034C, S72.035A, S72.035B, S72.035C, S72.036A, S72.036B, S72.036C, S72.041A, S72.041B, S72.041C, S72.042A, S72.042B, S72.042C, S72.043A, S72.043B, S72.043C, S72.044A, S72.044B, S72.044C, S72.045A, S72.045B, S72.045C, S72.046A, S72.046B, S72.046C, S72.051A, S72.051B, S72.051C, S72.052A, S72.052B, S72.052C, S72.059A, S72.059B, S72.059C, S72.061A, S72.061B, S72.061C, S72.062A, S72.062B, S72.062C, S72.063A, S72.063B, S72.063C, S72.064A, S72.064B, S72.064C, S72.065A, S72.065B, S72.065C, S72.066A, S72.066B, S72.066C, S72.091A, S72.091B, S72.091C, S72.092A, S72.092B, S72.092C, S72.099A, S72.099B, S72.099C, S72.101A, S72.101B, S72.101C, S72.102A, S72.102B, S72.102C, S72.109A, S72.109B, S72.109C, S72.111A, S72.111B, S72.111C, S72.112A, S72.112B, S72.112C, S72.113A, S72.113B, S72.113C, S72.114A, S72.114B, S72.114C, S72.115A, S72.115B, S72.115C, S72.116A, S72.116B, S72.116C, S72.121A, S72.121B, S72.121C, S72.122A, S72.122B, S72.122C, S72.123A, S72.123B, S72.123C, S72.124A, S72.124B, S72.124C, S72.125A, S72.125B, S72.125C, S72.126A, S72.126B, S72.126C, S72.131A, S72.131B, S72.131C, S72.132A, S72.132B, S72.132C, S72.133A, S72.133B, S72.133C, S72.134A, S72.134B, S72.134C, S72.135A, S72.135B, S72.135C, S72.136A, S72.136B, S72.136C, S72.141A, S72.141B, S72.141C, S72.142A, S72.142B, S72.142C, S72.143A, S72.143B, S72.143C, S72.144A, S72.144B, S72.144C, S72.145A, S72.145B, S72.145C, S72.146A, S72.146B, S72.146C, S72.21XA, S72.21XB, S72.21XC, S72.22XA, S72.22XB, S72.22XC, S72.23XA, S72.23XB, S72.23XC, S72.24XA, S72.24XB, S72.24XC, S72.25XA, S72.25XB, S72.25XC, S72.26XA, S72.26XB, S72.26XC

## Treatment ICD 10 PCS Codes

THA: 0SR9019, 0SR901A, 0SR901Z, 0SR9029, 0SR902A, 0SR902Z, 0SR9039, 0SR903A, 0SR903Z, 0SR9049, 0SR904A, 0SR904Z, 0SR9069, 0SR906A, 0SR906Z, 0SR90J9, 0SR90JA, 0SR90JZ, 0SRB019, 0SRB01A, 0SRB01Z, 0SRB029, 0SRB02A, 0SRB02Z, 0SRB039, 0SRB03A, 0SRB03Z, 0SRB049, 0SRB04A, 0SRB04Z, 0SRB069, 0SRB06A, 0SRB06Z, 0SRB0J9, 0SRB0JA, 0SRB0JZ

Hemiarthroplasty: 0SRR019, 0SRR01A, 0SRR01Z, 0SRR039, 0SRR03A, 0SRR03Z, 0SRR0J9, 0SRR0JA, 0SRR0JZ, 0SRS019, 0SRS01A, 0SRS01Z, 0SRS039, 0SRS03A, 0SRS03Z, 0SRS0J9, 0SRS0JA, 0SRS0JZ, 0QR60JZ, 0QR63JZ, 0QR64JZ, 0QR70JZ, 0QR73JZ, 0QR74JZ

Internal Fixation: 0QQ60ZZ, 0QQ63ZZ, 0QQ64ZZ, 0QQ70ZZ, 0QQ73ZZ, 0QQ74ZZ, 0QS604Z, 0QS606Z, 0QS634Z, 0QS636Z, 0QS644Z, 0QS646Z, 0QS704Z, 0QS706Z, 0QS734Z, 0QS736Z, 0QS744Z, 0QS746Z, 0QH604Z, 0QH606Z, 0QH634Z, 0QH636Z, 0QH644Z, 0QH646Z, 0QH704Z, 0QH706Z, 0QH734Z, 0QH736Z, 0QH744Z, 0QH746Z, 0SQ90ZZ, 0SQ93ZZ, 0SQ94ZZ, 0SQB0ZZ, 0SQB3ZZ, 0SQB4ZZ, 0QS704Z, 0QS706Z, 0QS734Z, 0QS736Z, 0QS744Z, 0QS746Z

### **Comorbidity ICD 10 CM codes**

Obesity (BMI > 30): E66.01, E66.09, E66.1, E66.2, E66.8, E66.9

Diabetes Mellitus: E08, E09, E10, E11, E12, E13

Heart Disease: I01, I05, I06, I07, I08, I09, I11, I12, I13, I20, I21, I22, I23, I24, I25, I34, I35, I36, I37, I42, I43, I44, I45, I47, I48, I49, I50, I52

Lung Disease: I26, I27, I28, J40, J41, J42, J43, J44, J45, J46, J47, J60, J61, J62, J63, J64, J65, J66, J67, J68, J69, J70, J96, J97, J98, J99

Kidney Disease: N00, N01, N02, N03, N04, N05, N06, N07, N08, N09, N10, N11, N12, N13, N14, N15, N16, N17, N18, N19, N25, N26, N27, N28, N29, Z49, Z94.0, Z99.2

Liver Disease: B15, B16, B17, B18, B19, K70, K71, K72, K73, K74, K75, K76, K77, Z94.4

Peripheral Vascular Disease: I70, I73, I74, I75

Hyperlipidemia: E78.00, E78.01, E78.1, E78.2, E78.3, E78.41, E78.49, E78.5, E78.6, E78.70, E78.71, E78.72, E78.79, E78.81, E78.89, E78.9

Hypertension: I10, I15, I16

Cancer: C00, C01, C02, C03, C04, C05, C06, C07, C08, C09, C10, C11, C12, C13, C14, C15, C16, C17, C18, C19, C20, C21, C22, C23, C24, C25, C26, C27, C28, C29, C30, C31, C32, C33, C34, C35, C36, C37, C38, C39, C40, C41, C42, C43, C44, C45, C46, C47, C48, C49, C50, C51, C52, C53, C54, C55, C56, C57, C58, C59, C60, C61, C62, C63, C64, C65, C66, C67, C68, C69, C70, C71, C72, C73, C74, C75, C76, C77, C78, C79, C80, C81, C82, C83, C84, C85, C86, C87, C88, C89, C90, C91, C92, C93, C94, C95, C96

Dementia: F01, F02, F03, G10, G30, G31, G32

Cerebrovascular Disease: I60, I61, I62, I63, I65, I66, I67, I68, I69

Alcohol abuse: F10.1

Tobacco use: Z72.0
